# Supplementary material
Source: publisher site journal article supplement (https://www.dovepress.com/get_supplementary_file.php?f=307366.docx)
Supplement: Supplementary file 1 [file get_supplementary_file.php]

**Supplementary materials**

Table 1 Characteristics of the groups: C (Q2 [%] (25 – 50)) and D (Q3 [%] (50 – 75))

| **Characteristics** | **Group C**  **Q2 [%] (25 – 50)** | **Group D**  **Q3 [%] (50 – 75)** |
| --- | --- | --- |
| n = 10 | n = 10 |
| **Age [years]** | 62.4 ± 8.4 | 59.2 ± 7.3 |
| **Male/Female** | 5/ 5 | 7/ 3 |
| **DM1/ DM2** | 4/ 6 | 3/ 7 |
| **Disease duration [years]** | 22.2 ± 17.6 | 12.6 ± 8.2 |
| **Body mass index (BMI) [kg/m2]** | 30.6 ± 6.5 | 28.8 ± 7.0 |
| **Smoking presence** | 2 (20.0) | 3 (30.0) |
| **Hypertension** | 8 (80.0) | 7 (70.0) |
| **Hyperlipidemia** | 4 (40.0) | 4 (40.0) |
| **Prevalent CVD** | 2 (20.0) | 3 (30.0) |
| **Retinopathy** | 6 (60.0) | 7 (70.0) |
| **Neuropathy** | 3 (30.0) | 3 (30.0) |
| **Nephropathy** | 1 (10.0) | 0 (0.0) |
| **HbA1c [%]** | 7.5 ± 1.3 | 8.1 ± 0.8 |
| **HRindex [%]** | 8.2 ± 2.5 | 7.8 ± 2.4 |
| **HRmax [%]** | 13.8 ± 2.6 | 13.2 ± 2.9 |
| **FM** | 20.8 ± 14.6 | 20.3 ± 16.6 |
| **FM(R)** | 36.3 ± 7.1 | 32.5 ± 15.3 |
| **HS** | 19.4 ± 2.7 | 11.3 ± 2.7 |

Continuous variables, mean ± SD; dichotomous variables, no. (%)

Table 2 Measured FMSF parameters for groups: C (Q2 [%] (25 – 50)) and D (Q3 [%] (50 – 75))

| **Code** | **Sex** | **DM type** | **HRindex**  **[%]** | **HRmax**  **[%]** | **FM** | **FM(R)** | **HS** |
| --- | --- | --- | --- | --- | --- | --- | --- |
| **Group C Q2 [%] (25 – 50)** | | | | | | | | |
| **161** | M | 2 | 2.4 | 8.4 | 5.4 | 41.9 | 23.7 |
| **2024** | M | 2 | 10.8 | 14.5 | 28.3 | 39.5 | 22.2 |
| **179** | F | 1 | 6.9 | 12.5 | 4.9 | 35.0 | 21.5 |
| **0023** | F | 1 | 11.2 | 16.9 | 48.1 | 37.5 | 20.9 |
| **0032** | F | 1 | 8.9 | 15.1 | 35.2 | 28.3 | 20.4 |
| **133** | F | 2 | 9.0 | 17.3 | 6.7 | 22.6 | 18.2 |
| **2021** | M | 2 | 8.7 | 11.7 | 15.5 | 35.3 | 18.0 |
| **2020** | M | 2 | 6.6 | 12.6 | 15.8 | 48.3 | 16.6 |
| **0097** | M | 2 | 9.0 | 14.2 | 15.0 | 35.3 | 16.4 |
| **206** | F | 1 | 8.7 | 14.3 | 32.9 | 39.2 | 16.2 |
| **Mean** |  |  | **8.2** | **13.8** | **20.8** | **36.3** | **19.4** |
| **Standard deviation** |  |  | **2.5** | **2.6** | **14.6** | **7.1** | **2.7** |
| **Group** **D Q3 [%] (50 – 75)** | | | | | | | | |
| **0045** | F | 2 | 9.2 | 17.3 | 6.0 | 59.9 | 14.9 |
| **0114** | M | 2 | 5.9 | 15.8 | 20.2 | 50.9 | 14.4 |
| **0095** | M | 2 | 4.8 | 8.6 | 62.9 | 36.4 | 14.2 |
| **5016** | F | 1 | 10.7 | 15.8 | 20.3 | 23.3 | 12.5 |
| **2022** | M | 2 | 8.5 | 12.3 | 9.3 | 18.9 | 12.0 |
| **0026** | M | 2 | 9.9 | 12.2 | 8.6 | 45.6 | 9.8 |
| **2023** | F | 2 | 11.3 | 15.2 | 8.0 | 19.5 | 9.7 |
| **0117** | M | 2 | 5.3 | 10.6 | 23.0 | 23.8 | 8.7 |
| **0066** | M | 2 | 7.1 | 14.1 | 18.9 | 32.0 | 8.3 |
| **0001** | M | 2 | 5.1 | 9.9 | 25.9 | 14.2 | 8.0 |
| **Mean** |  |  | **7.8** | **13.2** | **20.3** | **32.5** | **11.3** |
| **Standard deviation** |  |  | **2.4** | **2.9** | **16.6** | **15.3** | **2.7** |
